# Supplementary material for: Spontaneous resolution in a halogen bonded supramolecular architecture
Source: Royal Society of Chemistry journal article supplement (doi:10.1039/b417771a), 2005-01-01
Supplement: b417771a.doc [file b417771a.doc]

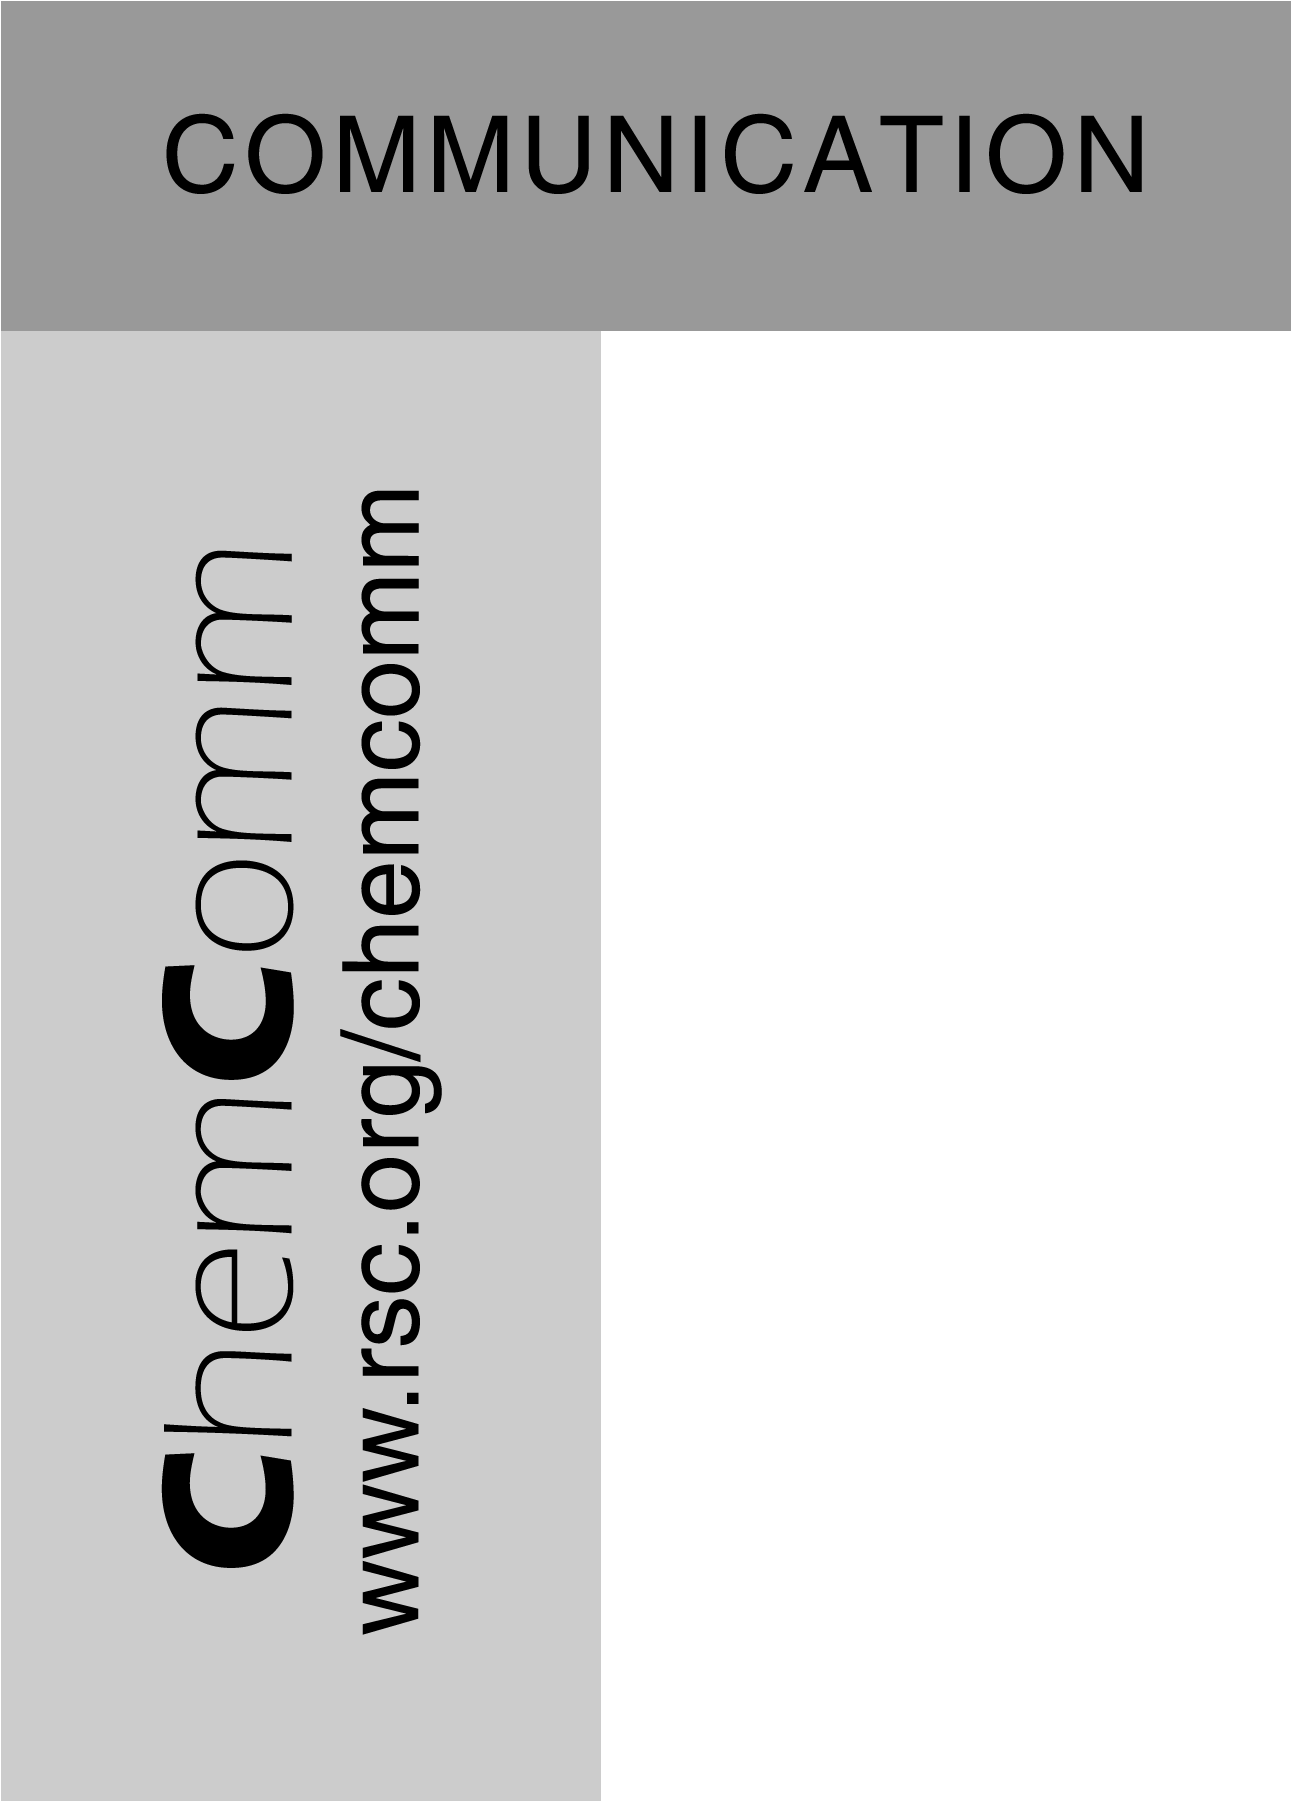
Spontaneous resolution
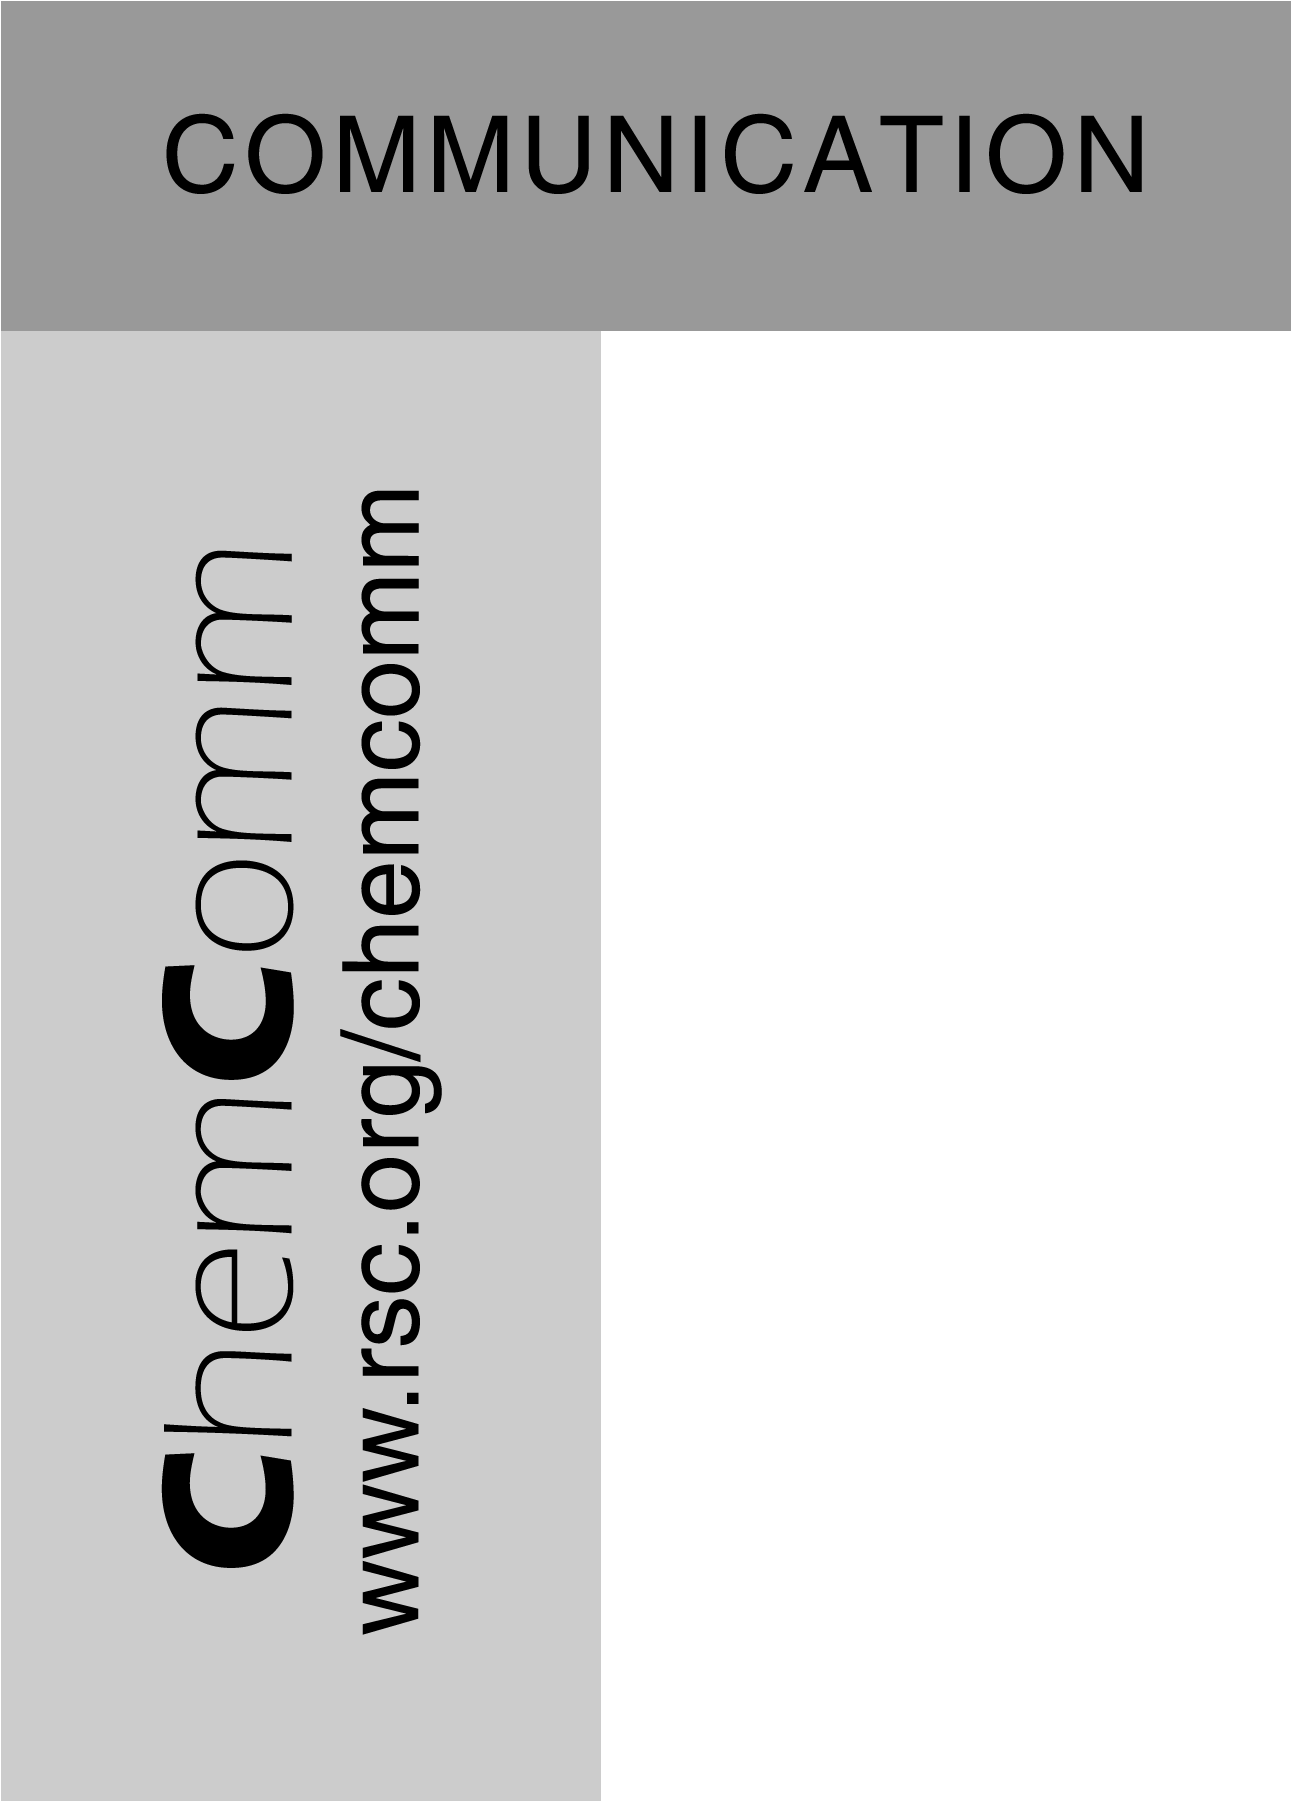
in a halogen bonded supramolecular architecture†

Hannes Neukirch,*a* Emanuela Guido,*a* Rosalba Liantonio,*a* Pierangelo Metrangolo,**a*

Tullio Pilati*b* and Giuseppe Resnati**a*

a NFMLab-Department of Chemistry, Materials, and Chemical Engineering “G. Natta”; Polytechnic of Milan; Via L. Mancinelli 7; 20131 Milan, Italy. Fax: +39 02 2399 3080; Tel: +39 02 2399 3032

(G. R.), 3041 (P. M.); E-mails: [giuseppe.resnati@polimi.it](mailto:giuseppe.resnati@polimi.it); [pierangelo.metrangolo@polimi.it](mailto:pierangelo.metrangolo@polimi.it);

Web-site: [http://nfmlab.chem.polimi.it](http://nfmlab.chem.polimi.it/)

b C.N.R.-Institute of Molecular Sciences and Technologies; University of Milan; Via C. Golgi 19; 20133 Milan, Italy.

# Electronic Supplementary Information

**Experimental Methods**

**General:**

The IR spectrum was recorded with a Nicolet Nexus FT-IR spectrophotometer equipped with the Smart Endurance system (UATR). The thermal analysis was recorded with a Linkam DSC600 Stage (temperature range: -196°C to 600°C) coupled with the LN94 cooling system.

Commercially available chemicals were used without further purification. Chemicals were purchased from *Sigma-Aldrich* and *Apollo Scientific*.

**Formation of the co-crystal 3:** Equimolar amounts of 1,8-diiodoperfluorooctane **1** and *N,N,N’,N’*-tetramethyl-*p*-phenylenediamine (**2**) were dissolved in a vial of clear borosilicate glass at room temperature. Chloroform was used as solvent. The open vial was placed in a closed cylindrical wide-mouth bottle containing CCl4. CHCl3 was allowed to diffuse at room temperature and after 24 hours yellowish co-crystals of **3** were obtained.

**Mp** (CHCl3, onset temperature): 104°C.

**IR** (cm-1, selected bands): 2978.9 (w), 2893.3 (w), 2853.1 (w), 1515.9 (m), 1475.4 (w), 1454.9 (w), 1301.7 (m), 1255.9 (w), 1194.1 (s), 1170.0 (s), 1133.1 (s), 1105.5 (s), 1080.3 (m), 1057.8 (m), 1048.3 (m), 936.9 (m), 816.9 (m), 776.4 (w), 718.7 (m), 679.9 (s), 654.9 (m).

**Fig. 4:** ORTEP III representation of the two separated rotamers of 1,8-diiodoperfluorooctane **1** halogen bonded to tetramethyl-*p*-phenylenediamine (**2**) in the co-crystal **3**.
